# Supplementary material
Source: PubMed Central journal article supplement (PMC3258893)

Fig. S1. The importance of Ser117 for sumoylation at Lys123 in SREBP-1a. COS-1 cells were transfected with expression plasmids for Flag-SUMO-1 and the wild type (WT) or a mutant version of GST-SREBP1a, as indicated. Thirty-six h later, the cells were harvested, lysed, and subjected to GST pull-down with glutathione-Sepharose resins as described under “EXPERIMENTAL PROCEDURES”. Aliquots of GST pull-down were subjected to SDS/PAGE and immunoblot (IB) with anti-Flag or anti-GST antibodies.

Fig. S2. IGF-1-induced phosphorylation of Lys123 enhances SREBP-1a transcriptional activity. COS-1 cells were transfected with expression plasmids for either 300 ng of the wild type (WT) or a mutant version of Gal4-SREBP-1a, 100 ng of pG5Luc containing five copies of the Gal4 binding sites, and 10 ng pRL-CMV. The cells were cultured with medium A containing 5% LPDS supplemented with 1  $\mu$ g/ml 25-hydroxycholesterol plus 10  $\mu$ g/ml cholesterol for 48 h in order to decrease the amount of endogenous SREBPs in the nucleus. The cells were incubated with or without 30nM IGF-1 for the last 6 h, and then luciferase assays were performed. The promoter activity driven by wild type Gal4-SREBP-1a in the absence of IGF-1 is represented as 1. All data are presented as the mean  $\pm$  S.D. values of three independent experiments performed in triplicate. \*,  $p < 0.05$ ; \*\*,  $p < 0.01$ .

Fig. S3. SREBP-2 is modified with SUMO-1, -2 and -3 at Lys464. COS-1 cells were transfected with expression plasmids for His-SUMO-1/-2/-3 and the wild type (WT) or a mutant version of Flag-SREBP2 (K464R), as indicated. Thirty-six h later, the cells were harvested, and the whole cell extracts (WCE) subjected to immunoprecipitation (IP) with anti-Flag antibodies. Aliquots of WCE and pellets of IP were subjected to SDS/PAGE and immunoblot (IB) with anti-His or anti-Flag antibodies.

Fig. S4. Sumoylation is not sufficient for the recruitment of the HDAC3 complex. (A and B) HEK293 cells were transfected with expression plasmids for HA-HDAC3 and either wild type (WT) or a mutant version of GST-SREBP-2, as indicated. The whole cell extracts (WCE) were subjected to GST pull-down with glutathione-Sepharose resins, as described under “EXPERIMENTAL PROCEDURES”. Aliquots of GST pull-down were subjected to SDS/PAGE and immunoblot (IB) with anti-HA or anti-GST antibodies. Aliquots of WCE were subjected to SDS/PAGE and IB with anti-HA antibodies.

**Fig.S1**

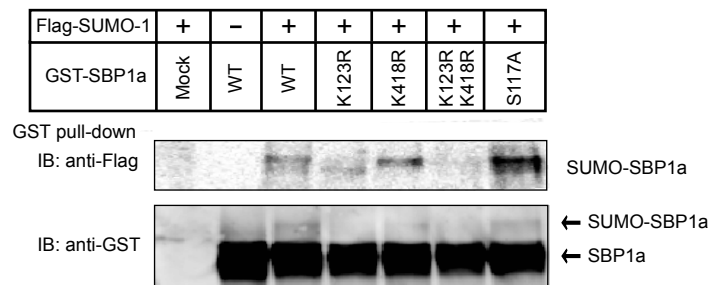

**Fig.S2**

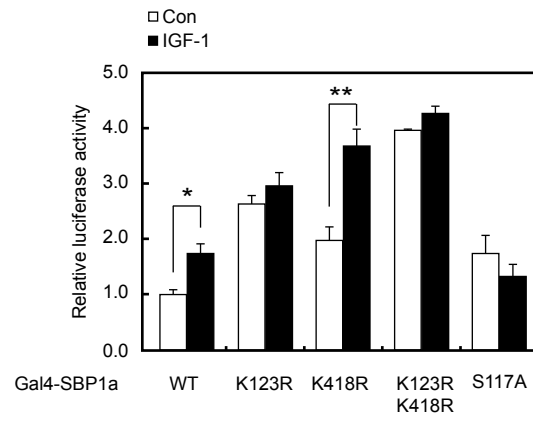

**Fig.S3**

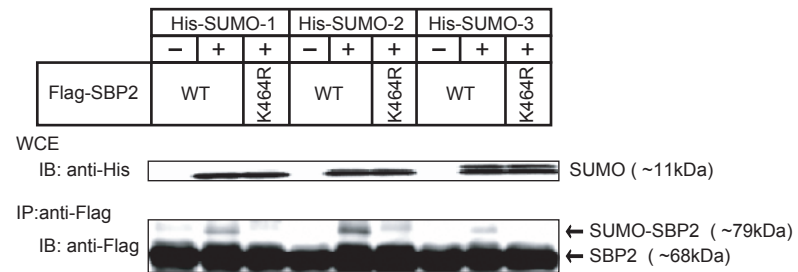

Fig.S4

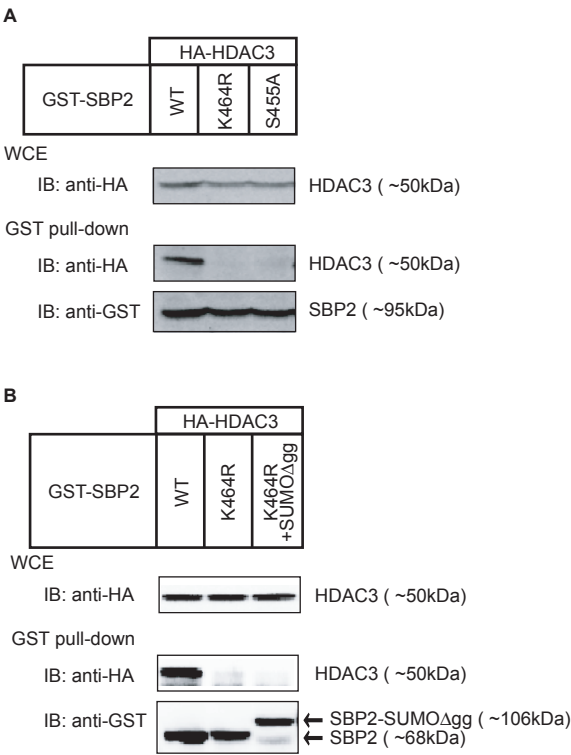

Supplement: M800910200_1.pdf [file M800910200_1.pdf]
